# Supplementary material for: Overexpression of ZmDHN15 Enhances Cold Tolerance in Yeast and Arabidopsis
Source: MDPI journal article supplement (doi:10.3390/ijms24010480), 2022-12-28
Supplement: s1 [file s1]

Supplementary Table S1. Primer sequences

| Destination segment name | Primer sequences (5'-3')                       |
|--------------------------|------------------------------------------------|
| Q-ZmDHN1-F               | CGAAGACTCGTTTAGGAGAAAC                         |
| Q-ZmDHN1-R               | TGCTGACCGTACTCCATGATG                          |
| Q-ZmDHN2-F               | AAGCCAGCCAAAGTTCAGAC                           |
| Q-ZmDHN2-R               | TGGTAGTGCGCCATACTTCCT                          |
| Q-ZmDHN3-F               | AAGCCAAAAGGCACTGAAGAAG                         |
| Q-ZmDHN3-R               | ACAGAACAGATCAGCAGGCTAGCTA                      |
| Q-ZmDHN4-F               | TAAAGCCAGCCAAAGTTCAGA                          |
| Q-ZmDHN4-R               | TGGTAGTGCGCCATACTTCCT                          |
| Q-ZmDHN15-F              | AAGCCAAAAGGCACTGAAGAAG                         |
| Q-ZmDHN15-R              | ACAGAACAGATCAGCAGGCTAGCTA                      |
| Q-ZmACTIN1-F             | CCACCCTACAATCTTCTTTCCC                         |
| Q-ZmACTIN1-R             | GCTTGATGTCTCCTGCCTCTTC                         |
| ZmDHN15-F                | AAGGCACTGAAGAAGCCAGTCA                         |
| ZmDHN15-R                | GAAACCAAAGCAATTATTAACGCAT                      |
| pYES2-ZmDHN15-F          | CCCAAGCTTAAGGCACTGAAGAAGCCAGTCA                |
| pYES2-ZmDHN15-R          | CGCGGATCCGAAACCAAAGCAATTATTAACGCAT             |
| pA7-ZmDHN15-F            | ACGGGGGACTCTTGACCATGGAAGGCACTGAAGAAGCCAGTCA    |
| pA7-ZmDHN15-R            | TCTCCTTTACTAGTCAGATCTGAAACCAAAGCAATTATTAACGCAT |
| pCAMBIA3301-ZmDHN15-F    | ACTCTTGACCATGGTAGATCTAAGGCACTGAAGAAGCCAGTCA    |
| pCAMBIA3301-ZmDHN15-R    | GGGAAATTCGAGCTGGTCACCGAAACCAAAGCAATTATTAACGCAT |
| Bar-F                    | TGACGCACAATCCCACTATCCT                         |
| Bar-R                    | GAAACCCACGTCATGCCAGT                           |
| Q-AtSOS1-F               | TGTTGCGTCACTTTGGGTAT                           |
| Q-AtSOS1-R               | TCCTCGT-CATCCCTTAGTTC                          |
| Q-AtSOD1-F               | CAGCTTAGAGAGAGAGAGAG                           |
| Q-AtSOD1-R               | CCATGTCATCCAAAGGGAGAA                          |
| Q-AtCAT3-F               | GCCGAGAGAAGACTGTGATTAG                         |
| Q-AtCAT3-R               | CGTCGACCCATCTGGTTATG                           |
| Q-AtCBF1-F               | GGCTGCGATGGAGATGGAGA                           |
| Q-AtCBF1-R               | GGGCATTGTCGGCGTTGTT                            |
| Q-AtCBF2-F               | GCTCCGATTACGAGTCTCCG                           |
| Q-AtCBF2-R               | CATCCCCAACATCGCCTCTT                           |
| Q-AtCBF3-F               | GATGACGACGTATCGTTATGGA                         |
| Q-AtCBF3-R               | TACACTCGTTTCTCAGTTTTACAA                       |
| Q-AtRD29A-F              | AGCCAAAACAGAGCACTTACACA                        |
| Q-AtRD29A-R              | AGCCAAAACAGAGCACTTACACA                        |
| Q-AtCOR15B-F             | GAAGCCAATGAAACTGCGACT                          |
| Q-AtCOR15B-R             | TACCCTCTACGAACTCAGCCG                          |
| Q-AtCOR47-F              | ACCAACAAGAATGCCTTCCA                           |
| Q-AtCOR47-R              | GCCGCATCCGATACACTCTTT                          |
| Q-AtACTIN1-F             | CTTGAGGTAGGATGAGACTGAG                         |
| Q-AtACTIN1-R             | CTGACTGAAGCAGATGATTCTG                         |
